1 **Role of Chemokine and TNF signaling pathway in oral squamous cell carcinoma:**  
2 **A RNA deep sequencing analysis of oral buccal mucosa squamous carcinoma**  
3 **model of Chinese hamster**

4

5 Guoqiang Xu<sup>a</sup>, Jianing Wei<sup>a</sup>, Bing Huangfu<sup>a</sup>, Jiping Gao<sup>a</sup>, Xiaotang Wang<sup>a</sup>, Lanfei  
6 Xiao<sup>a</sup>, Ruijing Xuan<sup>a</sup>, Zhaoyang Chen<sup>a</sup>, Guohua Song<sup>a</sup>

7

8 a. Laboratory Animal Center, Shanxi Key Laboratory of Experimental Animal Science  
9 and Human Disease Animal Model ,Shanxi Medical University, Road Xinjian 56,  
10 Taiyuan 030001, China

11 Guoqiang Xu and Jianing Wei contributed equally to this work.

12 Corresponding author: Guohua Song

13 Phone: 086-351-4135919

14 E-mail: ykdsgh@sxmu.edu.cn

15

16 **Abstract**

17 Oral cancer is one of the most common cancers in the world, meanwhile, differentially  
18 expressed genes are thought to regulate the development and progression of oral  
19 squamous cell carcinomas (OSCC). In this study we screened RNA transcripts from the  
20 oral buccal mucosa of healthy male Chinese hamster, divided into 3 groups: a control  
21 group with no disposal, a solvent control group coated with acetone solvent, and an  
22 experimental group coated with 0.5% DMBA acetone solution by high-throughput  
23 RNA sequencing. Tophat and Bowtie were used to align the high-quality reads into  
24 transcripts, DEseq was used to analysis the expression of differential gene. Then, the  
25 Gene Ontology (GO) enrichment analysis and Kyoto Encyclopedia of Genes and  
26 Genomes (KEGG) pathway enrichment analyses were conducted. The chemokine and  
27 TNF signaling pathway were differentially expression and the mRNA expression of  
28 *CXCL1* , *CXCL2* , *CXCL3* , *CCL7* , *MMP9*, monitored by qRT-PCR, increased  
29 remarkably in the cancer group and coincided with the result of RNA-Sequencing.  
30 Meanwhile, the *CXCL1*, *CXCL2*, *CXCL3*, and *CCL7* are significantly enriched in the  
31 chemokine signaling pathway, and *CXCL1*, *CXCL2*, *CXCL3*, and *MMP9* are  
32 significantly enriched in the tumor necrosis factor (TNF) signaling pathway. The  
33 differentially expression of the chemokine and TNF signaling pathway was a response  
34 to the invasion of the organism immune system due to oral buccal mucosa squamous

35 carcinoma. All the findings provided novel insights for further molecular researches of  
36 oral cancer.

37 **Keywords:** oral squamous cell carcinoma (OSCC), Chinese hamster, high-throughput  
38 sequencing, differentially expressed genes (DEGs)

### 39 **Introduction**

40 Oral cancer is one of the most frequent solid cancers worldwide, and oral squamous  
41 cell carcinoma (OSCC) constitutes around 90% of oral cancers (Siegel et al., 2014). It  
42 is highly invasive and metastatic at the advanced stage, and presents a substantial threat  
43 to human health. Meanwhile, there are 145000 deaths of OSCC in the world (1.8% of  
44 all cancer deaths in the world) annually; including 77% of the burden is in developing  
45 countries (Ferlay et al., 2015). Moreover, the incidence rate of OSCC is increasing,  
46 especially in younger people. Furthermore, OSCC has a very poor prognosis due to its  
47 invasive nature, the survival rate of patients with OSCC has not improved despite the  
48 improvements and innovations in diagnostic techniques and treatments (Shlok et al.,  
49 2010). However, clinical samples are pretty difficult to obtain and the less number of  
50 clinical samples meeting the experimental requirements is a major problem in oral  
51 cancer research, which seriously restricts the development of research on the  
52 mechanism of OSCC. Therefore, there is an urgent need for a better animal model of  
53 human OSCC lesions to help us better understand the pathogenesis of oral cancer.

54 The hamster cheek pouch is the most relevant known animal system that closely  
55 related to the human oral tumor like morphogenesis, phenotype markers and genetic  
56 alterations (Raimondi et al., 2005), meanwhile, the hamster buccal pouch mucosa is  
57 covered by a thin layer of keratinized stratified squamous epithelium that is similar in  
58 its thickness to the floor of the mouth and the ventral surface of the tongue in humans  
59 (Gimenez-Conti IB and TJ, 1993). Chinese hamster (*Cricetulus griseus*) also called  
60 striped-back hamster, is easy to operate by a single hand, has a buccal pouch on the  
61 each side of oral cavity. The establishment of animal models of Chinese hamster oral  
62 cancer can help us better study the development of oral cancer. In view of the above

63 advantages, Chinese hamster becomes the ideal animal model of research on OSCC  
64 mechanism.

65 Recently, the studies by Shih-Han Lee shows that, in the process of cancer, even if  
66 the DNA itself has not changed, the inactivation or alteration of the tumor suppressor  
67 gene may also generate. Further studies have shown that alterations in cancer obtained  
68 during mRNA processing can essentially simulate DNA changes in somatic cells, and  
69 patients also have tumor suppressor gene inactivation, which indicate that cancer  
70 diagnosis of DNA alone may ignore other important molecular information that  
71 promotes disease progression (Lee et al., 2018). In common with other cancers, the  
72 occurrence and progression of OSCC is a multistep process with the accumulation of  
73 genetic and epigenetic changes (Kang and Park, 2001). Evidence from various  
74 molecular and genetic studies suggests the association between squamous cell  
75 carcinoma initiation and development and the accumulation of genetic alterations at  
76 both the DNA and RNA levels (Gibb et al., 2010). Recent studies have indicated that  
77 the changes of mRNA expression levels in OSCC are associated with tumor  
78 development, maintenance, and progression. In addition, mRNAs could be potentially  
79 used as biomarkers of OSCC or other oral cancers (Lodi et al., 2010).

80 Compared to traditional techniques, next generation sequencing (NGS) offers  
81 greatly improved dynamic ranges and specificity for transcriptome analyses, while  
82 sample throughput is continuously increasing and costs are being reduced, and gives a  
83 far more precise measurement of transcript expression levels and a far more  
84 sophisticated characterization of transcript isoforms, even a far more reliable  
85 characterization of allele specific expression patterns (Christopher et al., 2010).  
86 Although there have been published reports on the successful construction of genome-  
87 wide mRNA expression profiles in other types of cancer, highlighting the power and  
88 capability of high-throughput sequencing techniques, there have been relatively few  
89 relating to OSCC (Li et al., 2011; Zhu et al., 2011). Herein, high-throughput RNA  
90 sequencing on tumor samples and their matched normal samples combined with qRT-  
91 PCR analysis were used to investigate the mechanisms of the occurrence and  
92 development of OSCC. We used the information to explore and predict the molecular

93 functions and biological pathways of the differentially expressed mRNAs. Our results  
94 have provided a basis for identifying further molecular markers for the diagnosis and  
95 treatment of OSCC.

96

## 97 **Materials and Methods**

### 98 **Establishment of animal model**

99 Sixty male Chinese hamsters (*Cricetulus griseus*, aged 8-10 weeks, 21-25g b.w.) were  
100 provided by the Experimental Animal Center of Shanxi Medical University (Taiyuan,  
101 China SCXK [Jin] 2015-0001), housed in standard hamster cages, maintained in a  
102 temperature-controlled environment with a 12 h light/dark cycle and fed a standard  
103 hamster diet and water ad libitum(SYXK [Jin] 2015-0001). After one-week acclimation,  
104 these hamsters were divided randomly into three groups: treatment group (24 hamsters),  
105 which was coated the buccal pouch with 0.5% 7,12-dimethylbenz[a]anthracene  
106 (DMBA) acetone solution; solvent control group (12 hamsters), which was only coated  
107 with acetone solution; control group (24 hamsters), which was subjected to no disposal.  
108 The doses were chosen on the basis of the previous studies, and to observe the entire  
109 carcinogenesis of oral cancer, animals were treated with DMBA three times a week for  
110 15 weeks (Rajasekar et al., 2016; Ramu et al., 2017). All experimental procedures were  
111 conducted and performed during the light cycle in accordance with the Animal Care  
112 and Use Committee regulations of Shanxi Medical University.

### 113 **Histopathological analysis**

114 The tumor tissues were fixed in 4% paraformaldehyde for about 48 hours, transferred  
115 to 70% ethanol, then processed in a graded series of ethanol solutions, embedded in  
116 paraffin and cut into 4 $\mu$ m thick sections. The sections were stained with hematoxylin  
117 and eosin (H & E) for histological examination. The histopathological specimens were  
118 observed under light microscope by oral pathologist experts. The pouch pathological  
119 changes were determined according to the 12 grade record in the WHO standard (None,  
120 1978).

## 121 **Ultrastructure of oral buccal pouch mucosa observation**

122 The oral buccal mucosa was extracted, washed with physiological saline, cut into 1-  
123 mm<sup>3</sup> pieces, fixed in 2.5% glutaraldehyde for 2h at 4°C dehydrated through a graded  
124 series of ethanol, embedded in epoxy resin, trimmed, sectioned, and observed and  
125 photographed under a JEM-1011 transmission electron microscope(Tokyo Japan).

## 126 **Enzyme-linked immunosorbent assay (ELISA)**

127 In order to investigate the serum levels of TNF- $\alpha$ , AFP, and SCC-Ag in serum of  
128 Chinese hamster with and without OSCC, we collected about 1 ml blood from each  
129 animal prior to surgery. Blood samples were allowed to clot for 30 min at room  
130 temperature (RT) and serum was obtained by centrifugation at 1300 g for 10 min at 4°C.  
131 Serum samples were then aliquoted and stored at - 80°C.

132 Serum samples were thawed on ice, the levels of TNF- $\alpha$  (Cat. MM-160001,  
133 MEIMIAN, China), AFP (Cat. JL-F46753, JiangLai, China), and SCC-Ag (Cat. JL-  
134 F46768, JiangLai, China) were detectable with the commercially available enzyme-  
135 linked immunosorbent assay (ELISA) kit according to manufacturer's instructions.

## 136 **RNA Sample Preparation**

137 All Chinese hamsters were killed by cervical dislocation on the week 15, six pairs of  
138 OSCC and normal buccal pouch samples of Chinese hamster, which had been identified  
139 by pathologists, were immediately isolated, frozen in liquid nitrogen and stored at -  
140 80 °C for RNA extraction and gene expression research. Total RNA was extracted from  
141 6 pairs of OSCC and normal buccal pouch samples using TRIzol (Invitrogen, USA)  
142 according to the protocol provided by the manufacturer. The purity and integrity of total  
143 RNA were monitored by NanoPhotometer® spectrophotometer (Implen, GER) and the  
144 Agilent 2100 Bioanalyzer (Agilent, USA), respectively.

## 145 **RNA Library Construction and Deep Sequencing**

146 Briefly, mRNA was isolated from total RNA using the FastTrack MAG mRNA Isolation  
147 Kits according to the manufacturer's instructions (Invitrogen, USA). Before doing any

148 further steps, Fragmentation Buffer (Agilent, USA) was applied to perform  
149 fragmentation on qualified mRNA coming from buccal pouch samples of Chinese  
150 hamster. Then, the mRNA was converted into double-stranded cDNA by reverse  
151 transcription. Following end repair and A-tailing, paired-end sequencing adaptors  
152 complementary to sequencing primers were ligated to the ends of the cDNA fragments.  
153 The ligated products were purified on 2% agarose gels, qualified fragments were  
154 selected for downstream enrichment by PCR. Each sample was subjected to sequencing  
155 from both ends by the Illumina Hiseq 2500 sequencing technology.

### 156 **Data Filtering**

157 Raw image data received by sequencing were transformed by base calling (CASAVA)  
158 into sequence data (termed Raw Reads). Raw Reads were filtered through data  
159 processing to get Clean Reads. We removed artificial reads, adapter contamination  
160 reads. High-quality reads with a length of >50 bp were reserved.

### 161 **RNA-seq Reads Alignment**

162 In our experiment, Tophat v2.0.12 was used to align the reads into transcripts based on  
163 the *Cricetulus griseus* reference genome in the UCSC (University of California Santa  
164 Cruz) genome database, and Bowtie2 was used to comparison analysis.

### 165 **Differential Expression Analysis**

166 DEseq was used to analysis the expression of differential gene, compare the expression  
167 of the same gene in normal buccal pouch and buccal pouch of OSCC in Chinese  
168 hamsters, and select genes with  $|\log_2\text{Ratio}| \geq 1$  and Corrected *P*-value < 0.05 as  
169 differentially expressed gene to obtain up-regulated and down-regulated genes.

### 170 **Gene Ontology Functional Analysis**

171 For gene expression profiling analysis, Gene Ontology (GO) enrichment analyses of  
172 functional significance were performed by hypergeometric testing to map all  
173 differentially expressed genes to GO terms. The calculated *P*-value is corrected and  
174 FDR < 0.05 was used as the threshold to judge the differential gene expression of

175 significantly enriched GO terms. The functional classification of the two groups of  
176 genes on the GO (Gene Ontology) was compared and the top ten of the three main  
177 ontology of GO term were selected for GO term enrichment analysis.

### 178 **KEGG Pathway Analysis**

179 The KEGG database was used to assign the assembled sequences (<http://www.genome.jp/kegg>), which can facilitate understanding of the biological functions of genes and  
180 identify significantly enriched metabolic pathways or signal transduction pathways in  
181 differentially expressed genes. The method of KEGG pathway analysis was the same  
182 as the GO analysis, and the significant enrichment pathway was analyzed by KAAS.  
183 FDR was used to correct the related parameters, pathways with  $FDR \leq 0.05$  were  
184 considered significantly enriched pathway.

### 186 **Quantitative Real Time PCR**

187 Quantitative real-time PCR (qRT-PCR), the traditional quantification method on gene  
188 expression, was adopted to further confirm the findings from the RNA-seq analysis. On  
189 the basis of the results, we filtered five significant differentially expressed genes  
190 involved in chemokine signaling pathway and TNF signaling pathway. According to  
191 Chinese hamster *CXCL1* sequence (Accession No: NM\_001244044.1), *CXCL2*  
192 sequence (Accession No: XM\_003510006.2), *CXCL3* sequence (Accession No:  
193 NM\_001244139.1), *CCL7* sequence (Accession No: XM\_003495790.2), *MMP9*  
194 sequence (Accession No: XM\_007641300.1) and  *$\beta$ -actin* sequence (Accession No:  
195 NM\_001244575.1) in GenBank, primers were designed with Primer Premier 5 software,  
196 evaluated by Oligo 6 software and subjected to Blast specificity tests at NCBI.  *$\beta$ -actin*  
197 was used as the endogenous control and all the primers were synthesized in Huada Gene.  
198 Primer sequence information is as Table 1.

199 The qRT-PCR analysis was conducted in a total volume of 20 $\mu$ L containing 10 $\mu$ l 2  
200  $\times$  SYBR<sup>®</sup> Premix Ex TaqII (Tli RNaseH Plus) (Takara Bio Inc., China), combined  
201 with sense and antisense primers (0.8  $\mu$ l, final concentration 0.4  $\mu$ M), ddH<sub>2</sub>O 6.4  $\mu$ l,  
202 and 2  $\mu$ l diluted cDNA in Optical 8-Tube Strip using the Applied Biosystems 7300

203 Real-Time PCR Instrument (ABI, USA). The conditions for real-time PCR were as  
204 follows: after initial denaturation at 95°C for 30 s, 40 PCR cycles were started with  
205 thermo cycling conditions at 95°C for 5 s, 60°C for 30 s, and then a melting curve  
206 analysis was performed to verify the specificity of the PCR product. Every sample was  
207 analyzed in triplicate. System software and the  $2^{-\Delta\Delta C_t}$  method were applied to  
208 quantitative calculation.

## 209 **Data Analysis**

210 Statistical analysis was performed using SPSS v17.0 software and Student's t-test was  
211 used to analyze the OSCC and normal tissue samples. All values in the experiment were  
212 expressed as mean  $\pm$  SEM (standard error of the mean) and values of  $P < 0.05$ , were  
213 expressed statistically significant.

## 214 **Result**

### 215 **The effect of DMBA-induced oral carcinogenesis**

216 To identify cancer tissues of oral buccal pouch mucosa cancer model of Chinese  
217 hamster, we examined the histological changes of buccal pouch mucosa by HE stain  
218 (Figure 1). It's important to note that in our research no significant differences were  
219 observed in solvent control group compared with the control group after 15 weeks  
220 acetone solution treatment. Meanwhile, when dissecting, we found that buccal pouch  
221 of the cancer group became embrittled and shrinking volume. Furthermore, compared  
222 with the control group, we observed the cancer group showed atypical nuclear division  
223 with initial keratinization and enlarged nucleoli, cells broke through the basement  
224 membrane, infiltrating the lamina propria and connective tissue, and tumor islands  
225 emerged, was highly differentiated squamous cell and invasive cancer. All of these  
226 provided the support for sequence analysis.

### 227 **The change of oral buccal pouch mucosa ultrastructure**

228 In order to further understand the alterations in the buccal pouch of the cancer group,  
229 we used transmission electron microscope to detect them (Figure 2). Compared with



230 the control group, in the cancer group, the shape of the cells is irregular, the nucleolus  
231 is concentrated, the nucleus is jagged, the nuclear membrane is invaginated, and the  
232 desmosome is reduced or even disappeared.

### 233 **The levels of the TNF- $\alpha$ , AFP, and SCC-Ag**

234 Measures of TNF- $\alpha$ , AFP, and SCC-Ag in serum of OSCC Chinese hamsters were  
235 shown in Figure 3. The level of serum TNF- $\alpha$  in Chinese hamsters with OSCC was  
236 significantly lower than healthy control group ( $P < 0.01$ ). While, the level of serum  
237 SCC-Ag was higher than healthy control group ( $P < 0.05$ ). Among them, AFP values  
238 were not significantly different between control and OSCC.

### 239 **Overview of Sequencing Data from RNA-seq Analysis**

240 In both the cancer and normal groups, about  $(32 \sim 44) \times 10^6$  reads (73 ~ 92% of the  
241 total raw reads) were aligned to *Cricetulus griseus* reference genome sequence among  
242 samples, with an average of  $38 \times 10^6$  reads per sample. The unique alignment sequence  
243 of the two groups accounts for 70 ~ 90% of the reference genome. The distribution of  
244 the unique alignment sequences in the reference genome was shown in Figure 4.

### 245 **Analysis of Differentially Expressed Genes**

246 Analysis of the data indicated that there were 194 significantly differentially expressed  
247 genes in the treated samples, of which 66 (34.02%) were down-regulated and 128  
248 (65.97%) were up-regulated (Figure 5). The top five up-regulated and down-regulated  
249 genes with the significant changes in expression were shown in the Figure 6A, and the  
250 top thirty of the altered genes was listed in Table 2. The hierarchical cluster analysis of  
251 differentially expressed genes in Cancer and Normal groups revealed that multiple gene  
252 modules were formed by many genes with similar expression trends, and these genes  
253 may be involved in the occurrence, metastasis, and invasion of oral squamous cell  
254 carcinoma (Figure 6).

### 255 **Differential Expression GO Analysis**

256 In the GO (Gene Ontology) statistics of differentially expressed genes, 184 genes were  
257 classified according to the GO classification method, and the amount of up-regulated  
258 and down-regulated differentially expressed genes in each subclass was calculated  
259 (Figure 7). The GO enrichment analysis of differentially expressed genes in cancer  
260 samples identified 120 biological processes, 18 cellular components, and 2 molecular  
261 functions that are closely related to OSCC and the top ten of them are listed in the Table  
262 3.

### 263 **KEGG Pathway Enrichment Analysis**

264 Based on the analysis of KEGG pathway enrichment, we found that differentially  
265 expressed genes in the cancer group were mainly enriched in 8 signaling pathways  
266 including tumor necrosis factor pathway (TNF), chemokine pathway, cytokine  
267 interaction pathway, extracellular matrix receptor interaction pathway, protein digestion  
268 pathway and absorption pathway; and the number of enriched gene in the cytokine  
269 interaction pathway and chemokine pathway is the highest, suggesting that these  
270 pathways may play an crucial role in tumorigenesis, invasion and metastasis (Table 4).

271 We screened five differentially expressed genes related to OSCC, the Table 5 clearly  
272 reflects that CXCL1, CXCL2, CXCL3, CCL7, and MMP9 are enriched in multiple GO  
273 terms and KEGG pathways. As is depicted in the Figure 8(Kanehisa et al., 2017),  
274 CXCL1, CXCL2, CXCL3, and CCL7 are significantly enriched in the chemokine  
275 signaling pathway (Figure 8A), whereas CXCL1, CXCL2, CXCL3, and MMP9 are  
276 significantly enriched in the tumor necrosis factor signaling pathway (Figure 8B),  
277 suggesting that CXCL1, CXCL2, CXCL3, CCL7, and MMP9 may participate in the  
278 development of OSCC by molecular dialogues and interactions in metabolic pathways.

### 279 **Expression Analysis by qRT-PCR**

280 Based on the RNA deep sequencing analysis of the expression, five genes, including  
281 CXCL1, CXCL2, CXCL3, CCL7 and MMP9, were selected for confirmation as well  
282 as to monitor their expression with qRT-PCR, and the data was statistically analyzed as  
283 follows (figure 9).

284 Compared with normal group, in the cancer group the mRNA expression level of  
285 CXCL1, CXCL2, CXCL3, CCL7 and MMP9 increased remarkably. Meanwhile the  
286 transcriptome sequencing revealed that the differentially expressed genes: CXCL1,  
287 CXCL2, CXCL3, CCL7 and MMP9 were also significantly up-regulated in the cancer  
288 group compared to the normal group. The relative expression of mRNA detected by  
289 qRT-PCR and the transcriptome sequencing data (RPKM) were highly consistent,  
290 indicating that the sequencing data was reliable, suggesting that CXCL1, CXCL2,  
291 CXCL3, CCL7 and MMP9 may promote the development, invasion and metastasis of  
292 OSCC.

## 293 Discussion

294 Oral cancer is the most common malignancy of head and neck cancer in the world and  
295 it is a leading cause of cancer-related mortality. Epidemiological data have shown that  
296 high risk factors, such as tobacco, alcohol and Human papillomavirus infection are  
297 closely related to OSCC (Chi et al., 2015). Recently, the incidence of oral cancer is  
298 rising with ages every year and more seriously, the patients are mostly diagnosed at a  
299 relatively late stage which lead to increase in the cost of treatment and decrease in  
300 treatment outcomes(Oh et al.). In the present biological era, the prognosis of this deadly  
301 disease has improved to some extent because of the enhancement of technologies  
302 (Frédérique et al., 2012), but diagnosing the tumor at its initial stages relapse, and  
303 metastasis are the major challenge to improve the scope of patient survival (Dahiya and  
304 Dhankhar, 2016). Therefore, it is urgent and imperative to delve into the molecular  
305 mechanisms of the development and progression of oral cancer to guide clinical  
306 treatment and prognosis.

307 Since Sally first established the DMBA-induced oral carcinogenesis model in the  
308 cheek pouch of hamster in 1954, it has become a classic animal model of OSCC (Salley,  
309 1954). In present study, we successfully constructed the animal model of OSCC using  
310 tri-weekly applications of a 5% solution of DMBA in acetone onto the cheek pouch of  
311 Chinese hamsters over about a 15-week period. For models like the hamster model for

312 OSCC, high-throughput sequencing provides a powerful tool for analyzing both mRNA  
313 expression patterns and quantitative expression levels, as it profiles thousands of genes  
314 simultaneously. New high-throughput sequencing technologies have enabled the  
315 detection of novel transcripts through increased sensitivity. These recent advances have  
316 facilitated more comprehensive and more thorough research into the effects of  
317 transcription and translation (Zeng JH et al., 2019). This technology is much more  
318 efficient than the now outmoded and time-consuming methods used in earlier work,  
319 and is becoming the broadest transcriptome research tool available.

320 Different from earlier studies, our study considered the development and progression  
321 of OSCC holistically, including a variety of pathways and genes, rather than just a single  
322 factor. Using high-throughput sequencing analysis, we evaluated mRNA expression  
323 profiles of OSCC and normal cheek pouch mucosa tissues, and identified 128 mRNAs  
324 that were up-regulated and 66 down-regulated in cancer tissues compared with normal  
325 tissues. What's more, because genes often cooperate with each other to perform their  
326 biological functions, pathway analyze facilitate further understanding genes and their  
327 roles. By the KEGG enrichment analysis, we found that differentially expressed genes  
328 were enriched in 317 pathways, of which 8 pathways were significantly enriched. In  
329 addition, we used GO analysis to screen genes which were significantly enriched in  
330 pathways, and selected five genes(*CXCL1*, *CXCL2*, *CXCL3*, *CCL7*, and *MMP9*) that  
331 were highly expressed in OSCC, may be closely related to the development of oral  
332 cancer and significantly enriched in chemokine signaling pathway and TNF signaling  
333 pathway for qRT-PCR to validate transcriptome sequencing. The GO functional  
334 enrichment analysis showed that the differentially expressed mRNAs in OSCC were  
335 mainly enriched in cellular components, including extracellular matrix, extracellular  
336 space and extracellular region, etc; involved molecular functions that included cytokine  
337 activity and extracellular matrix structural constituent; involved biological processes  
338 that included granulocyte chemotaxis, granulocyte migration, cell chemotaxis, cell  
339 migration, cell motility and localization of cell, etc. RT-qPCR confirmed that the  
340 expression of *CXCL1*, *CXCL2*, *CXCL3*, *CCL7* and *MMP9* were consistent with RNA-  
341 seq. Meanwhile, qRT-PCR confirmed that *CXCL2* had the largest differential

342 expression folds in OSCC tissues, revealing that *CXCL2* may play a central role in the  
343 molecular mechanism of OSCC. The high expression of *CXCL2* suggests that it can be  
344 used as a new target for diagnosis, treatment and prognosis of OSCC, and it also  
345 provides novel ideas and important theoretical basis for the search for potential  
346 molecular markers of oral cancer. These findings suggest that there is still an  
347 inflammatory response during OSCC and the previous differential expression analysis  
348 also reflected that chemokine is still highly expressed in OSCC. In summary, the  
349 inflammatory response is in an uncontrollable state and it is difficult to restore the  
350 body's homeostasis, eventually resulting in the production of tumors.

351 Chemokines are a group of small proteins(8–12 KDs), responsible for transmitting  
352 signals for cell migration, inflammation regulation, and angiogenesis, classified into  
353 four subgroups referred to as *CXC/α*, *CC/β*, *CX3C/δ* or *C/δ* families (Baggiolini, 1998;  
354 Zlotnik and Yoshie, 2000). They are mostly known for their role in immunosurveillance  
355 and inflammatory responses, but they have been also implicated in many pathological  
356 processes of malignant tumor (Mahboobeh et al., 2014). Recently, the research of  
357 chemokines in the oncology has drawn extensive attention. Meanwhile, related studies  
358 have demonstrated the involvement of chemokines and their receptors in various tumors  
359 such as liver cancer, nasopharyngeal cancer, and breast cancer (Jing et al., 2016; Shah  
360 et al., 2015; Weitzenfeld et al., 2016). Abnormal function of chemokines in cancer  
361 promotes cell survival, facilitated proliferation, angiogenesis, and metastasis in  
362 multiple types of tumors (Paola et al., 2011). The research of Vera Levina indicate that  
363 chemokines and growth factors produced by tumors by binding to the cognate receptors  
364 on tumor and stroma cells could provide proliferative and anti-apoptotic signals helping  
365 tumors to escape drug-mediated destruction (Vera et al., 2010). Furthermore, it is  
366 believed that chronic inflammatory conditions facilitate oral carcinogenesis, and  
367 functions of cytokine-dependent and chemokine-dependent immunoregulatory  
368 pathways are apparent in oral carcinoma.

369 Among them, Jung(Da-Woon et al., 2010) confirmed that *CCL7* may participate in  
370 the invasion and metastasis of OSCC through a molecular dialogue with the *CCR1* and  
371 *CCR3*. In this study, the chemokine *CXCL2*, *CXCL3*, and *CXCL1* were all highly

372 expressed in OSCC, and Peng (Peng et al., 2015) also detected significant upregulation  
373 of *CXCL2* and *CXCL3* by microarray analysis of OSCC in rats, indicating abnormal  
374 expression of *CXCL1*, *CXCL2* and *CXCL3* is an important factor leading to pathological  
375 changes in the oral cancer model. Furthermore, OSCC microarray analysis also  
376 reflected abnormal expression of *CXCL1*, *CXCL2* and *CXCL3* in tumor tissues  
377 (Sanjukta et al., 2015), while clinical and follow-up basic studies on *CXCL1*, *CXCL2*,  
378 and *CXCL3* are rare in oral cancer and most of them are found in liver cancer, prostate  
379 cancer and breast cancer (Gui et al., 2016; Li et al., 2015; See et al., 2014). Thence, the  
380 further study of these significantly different chemokines in the pathogenesis has  
381 important implications for the diagnosis and treatment of oral cancer.

382 Matrixmetallo-proteinases (MMPs) are major proteolytic enzymes that are involved  
383 in the normal extracellular matrix (ECM) turnover. Its main function is to degrade and  
384 remodel the ECM, maintain the dynamic balance of ECM, and participate in many  
385 pathological and physiological processes in the body. Many of clinical studies have  
386 confirmed the high expression of *MMP9* and *MMP13* in OSCC (Jingqiu et al., 2015;  
387 Monteiro et al., 2016; Nanda et al., 2014), which is consistent with our research.  
388 Monteiro (Monteiro et al., 2016) applied immunohistochemistry to detect the  
389 expression of MMP9 protein in 60 cases of OSCC and found that *MMP9* was strongly  
390 expressed in cytoplasm of tumor cell in 83.7% of patients, suggesting that *MMP9* is a  
391 potential tumor marker of oral cancer. Yu (Yu et al., 2011) knocked out the chemokine  
392 receptor *CXCR4* gene in Tca8113 cells, as a result, the expression levels of *MMP9* and  
393 *MMP13* were significantly reduced, and the invasion and metastasis of cells were  
394 weakened, suggesting that *MMP9* and *MMP13* play a pivotal role in the invasion and  
395 metastasis of OSCC. The matrix metalloproteinase we screened is *MMP9*, which is  
396 enriched with *CXCL1*, *CXCL2*, and *CXCL3* in TNF signaling pathway, suggesting that  
397 *MMP9* may promote tumorigenesis through the interaction with chemokines. Gao et al.  
398 (Gao et al., 2015) said that *CXCL5/CXCR2* axis activates the PI3K/AKT signaling  
399 pathway of the tumor signaling pathway, leading to the up-regulation of *MMP2* and  
400 *MMP9*, which promotes the metastasis of bladder cancer, confirming the interaction  
401 between *MMP9* and chemokines. However, the specific interaction between *MMP9* and

402 *CXCL1, CXCL2, CXCL3* in OSCC still needs further study. Judging from these figures,  
403 we can draw the conclusion that the expression trend of the five genes in qRT-PCR was  
404 consistent with the transcriptome sequencing, which validated the reliability of RNA-  
405 seq data and further demonstrated that the chemokine signaling pathway and TNF  
406 signaling pathway may closely related to the occurrence and development of OSCC.

407 To our knowledge, our study presents the first genomewide profiling of mRNAs of  
408 squamous cell carcinoma in oral buccal pouch of Chinese hamster by high-throughput  
409 RNA-Seq. In addition, our findings support previous studies reporting that the  
410 progression of OSCC was influenced by chemokines, suggesting that chemokine  
411 signaling pathway, Cytokine-cytokine receptor interaction signaling pathway, and TNF  
412 signaling pathway may play a central role in the invasion and metastasis of OSCC  
413 (Farkas et al., 2013; Toung et al., 2011). Peeping a spot to see overall picture: local  
414 delicate change was packed with the complex issues of the whole organism. But for the  
415 further verification and exploration, researches on the cellular level and the significant  
416 expression of proteins during the development and progression of OSCC should be  
417 carried out.

## 418 **Conclusions**

419 All the findings, including the chemokine signaling pathway, TNF signaling pathway  
420 and classic genes provided an extensive bioinformatics analysis of DEGs and revealed  
421 a series of targets and pathways, which may affect the carcinogenesis and progression  
422 of OSCC, for future investigation. These findings add to significant insights into the  
423 diagnosis and treatment of this disease. Meanwhile, it should be noted that this study  
424 examined the DEGs in oral cancer Chinese hamster animal model by qRT-PCR and  
425 bioinformatics analysis; further research needs to be done to explore more specific  
426 mechanisms. Notwithstanding its limitation, these findings significantly improved the  
427 understanding of underlying molecular mechanisms in OSCC, and the key genes and  
428 pathways could be used as diagnostic and therapeutic targets and diagnostic biomarkers.

429

## 430 **Acknowledgements**

431 Thank University of Shanxi Medical University for offering a powerful bioinformatics  
432 platform for our study. Thank Professor Guohua Song for her careful guidance.

## 433 **Competing interests**

434 The authors declare no competing or financial interests.

## 435 **Author contributions**

436 G.H.S. designed the study and contributed funding. G.Q.X., J.N.W., and B.HF.  
437 established animal model, completed RNA sequencing and statistical analyze. L.F.X,  
438 X.T.W., J.P.G. AND R.J.X. collected samples and processed samples. Z.Y.C. provided  
439 the necessary tools and instruments for the experiments. G.Q.X. and J.P.G. contributed  
440 to writing the manuscript. All authors discussed the results and commented on the  
441 manuscript.

442

## 443 **Funding**

444 This research was funded by National Natural Science Foundation of China (Grant Nos  
445 31772551, and Grant Nos 31970513) through research grants to G.H.S..

446

## 447 **Reference**

- 448 **Baggiolini, M.** (1998). Chemokines and leukocyte traffic. *Nature* **392**, 565-568.
- 449 **Chi, A. C., Day, T. A. and Neville, B. W.** (2015). Oral cavity and oropharyngeal squamous cell  
450 carcinoma--an update. *Ca A Cancer Journal for Clinicians* **65**, 401-421.
- 451 **Christopher, G., Jiangwen, Z., Butler, J. E., David, H. and Catherine, D.** (2010). Sex-specific parent-  
452 of-origin allelic expression in the mouse brain. *Science* **329**, 682-685.
- 453 **Da-Woon, J., Min, C. Z., Jinmi, K., Kyungshin, K., Ki-Yeol, K., Darren, W. and Jin, K.** (2010). Tumor-  
454 stromal crosstalk in invasion of oral squamous cell carcinoma: a pivotal role of CCL7. *International*  
455 *Journal of Cancer* **127**, 332-344.
- 456 **Dahiya, K. and Dhankhar, R.** (2016). Updated overview of current biomarkers in head and neck  
457 carcinoma. *World Journal of Methodology* **6**, 77-86.
- 458 **Farkas, M. H., Grant, G. R., White, J. A., Sousa, M. E., Consugar, M. B. and Pierce, E. A.** (2013).  
459 Transcriptome analyses of the human retina identify unprecedented transcript diversity and 3.5 Mb of  
460 novel transcribed sequence via significant alternative splicing and novel genes. *Bmc Genomics* **14**, 486-  
461 486.
- 462 **Ferlay, J., Soerjomataram, I., Dikshit, R., Eser, S., Mathers, C., Rebelo, M., Parkin, D. M., Forman,**  
463 **D. and Bray, F.** (2015). Cancer incidence and mortality worldwide: sources, methods and major patterns  
464 in GLOBOCAN 2012. *International Journal of Cancer* **136**, E359-E386.
- 465 **Frédérique, N., Jean-Charles, S. and Fabien, C.** (2012). Tumour molecular profiling for deciding  
466 therapy-the French initiative. *Nature Reviews Clinical Oncology* **9**, 479-486.
- 467 **Gao, Y., Guan, Z., Chen, J., Xie, H., Yang, Z., Fan, J., Wang, X. and Li, L.** (2015). CXCL5/CXCR2 axis  
468 promotes bladder cancer cell migration and invasion by activating PI3K/AKT-induced upregulation of  
469 MMP2/MMP9. *International Journal of Oncology* **47**, 690-700.



- 470 **Gibb, E. A., Enfield, K. S., Tsui, I. F., Chari, R., Lam, S., Alvarez, C. E. and Lam, W. L.** (2010).  
471 Deciphering squamous cell carcinoma using multidimensional genomic approaches. *Journal of Skin*  
472 *Cancer* **2011**, 541405.
- 473 **Gimenez-Conti IB and TJ, S.** (1993). The hamster cheek pouch carcinogenesis model. *J Cell Biochem*  
474 **1**, 83-90.
- 475 **Gui, S. L., Teng, L. C., Wang, S. Q., Liu, S., Lin, Y. L., Zhao, X. L., Liu, L., Sui, H. Y., Yang, Y. and Liang,**  
476 **L. C.** (2016). Overexpression of CXCL3 can enhance the oncogenic potential of prostate cancer.  
477 *International Urology & Nephrology* **48**, 1-9.
- 478 **Jing, Y., Xing, L., Chen, J., Xie, C., Xia, W., Chen, J., Zeng, T., Ye, Y., Ke, L. and Yu, Y.** (2016). CCL2-  
479 CCR2 axis promotes metastasis of nasopharyngeal carcinoma by activating ERK1/2-MMP2/9 pathway.  
480 *Oncotarget* **7**, 15632-15647.
- 481 **Jingqiu, B., Xi, B., Bing, L., Fei, C. and Peng, C.** (2015). Inhibition of metastasis of oral squamous  
482 cell carcinoma by anti-PLGF treatment. *Tumour Biology the Journal of the International Society for*  
483 *Oncodevelopmental Biology & Medicine* **36**, 2695.
- 484 **Kanehisa, M., Furumichi, M., Mao, T., Sato, Y. and Morishima, K.** (2017). KEGG: new perspectives  
485 on genomes, pathways, diseases and drugs. *Nucleic Acids Research* **45**, D353-D361.
- 486 **Kang, M. K. and Park, N. H.** (2001). Conversion of normal to malignant phenotype: telomere  
487 shortening, telomerase activation, and genomic instability during immortalization of human oral  
488 keratinocytes. *Crit Rev Oral Biol Med* **12**, 38-54.
- 489 **Lee, S.-H., Singh, I., Tisdale, S., Abdel-Wahab, O., Leslie, C. S. and Mayr, C.** (2018). Widespread  
490 intronic polyadenylation inactivates tumour suppressor genes in leukaemia. *Nature* **561**, 127-131.
- 491 **Li, L., Xu, L., Yan, J., Zhen, Z. J., Ji, Y., Liu, C. Q., Wan, Y. L., Zheng, L. and Xu, J.** (2015). CXCR2-  
492 CXCL1 axis is correlated with neutrophil infiltration and predicts a poor prognosis in hepatocellular  
493 carcinoma. *Journal of Experimental & Clinical Cancer Research* **34**, 1-10.
- 494 **Li, X., Chen, J., Hu, X., Huang, Y., Li, Z., Zhou, L., Tian, Z., Ma, H., Wu, Z., Chen, M. et al.** (2011).  
495 Comparative mRNA and microRNA expression profiling of three genitourinary cancers reveals common  
496 hallmarks and cancer-specific molecular events. *Plos One* **6**, e22570-e22570.
- 497 **Lodi, G., , Franchini, R., , Bez, C., , Sardella, A., , Moneghini, L., , Pellegrini, C., , Bosari, S., ,**  
498 **Manfredi, M., , Vescovi, P., . and Carrassi, A., .** (2010). Detection of survivin mRNA in healthy oral  
499 mucosa, oral leucoplakia and oral cancer. *Oral Diseases* **16**, 61-67.
- 500 **Mahboobeh, R., Fahimeh, A., Mousa, T., Ali, M., Nooshafarin, C. and Abbas, G.** (2014). Expression  
501 of chemokines and chemokine receptors in brain tumor tissue derived cells. *Asian Pacific Journal of*  
502 *Cancer Prevention Apjcp* **15**, 7201-5.
- 503 **Monteiro, L., Delgado, M., Ricardo, S., Amaral, B., Salazar, F., Pacheco, J., Lopes, C., Bousbaa, H.**  
504 **and Warnakulasuryia, S.** (2016). Prognostic significance of CD44v6, p63, podoplanin and MMP - 9 in  
505 oral squamous cell carcinomas. *Oral Diseases* **22**, 303-312.
- 506 **Nanda, D. P., Dutta, K., , Ganguly, K. K., Hajra, S., , Mandal, S. S., Biswas, J., . and Sinha, D., .**  
507 (2014). MMP-9 as a potential biomarker for carcinoma of oral cavity: a study in eastern India.  
508 *Neoplasma* **61**, 747-757.
- 509 **None.** (1978). Definition of leukoplakia and related lesions: An aid to studies on oral precancer.  
510 *Oral Surgery Oral Medicine & Oral Pathology* **46**, 518,539-537,539.
- 511 **Oh, H. N., Oh, K. B., Lee, M. H., Seo, J. H., Kim, E., Yoon, G., Cho, S. S., Cho, Y. S., Choi, H. W. and**  
512 **Chae, J. I.** JAK2 regulation by Licochalcone H inhibits the cell growth and induces apoptosis in oral  
513 squamous cell carcinoma. *Phytomedicine*.

- 514 **Paola, A., Giovanni, G., Federica, M. and Alberto, M.** (2011). Chemokines in cancer related  
515 inflammation. *Experimental Cell Research* **317**, 664-673.
- 516 **Peng, X., Li, W., Johnson, W. D., Torres, K. E. and McCormick, D. L.** (2015). Overexpression of  
517 lipocalins and pro-inflammatory chemokines and altered methylation of PTGS2 and APC2 in oral  
518 squamous cell carcinomas induced in rats by 4-nitroquinoline-1-oxide. *Plos One* **10**, e0116285.
- 519 **Raimondi, A., Cabrini, R. and Itoiz, M. E.** (2005). Ploidy analysis of field cancerization and cancer  
520 development in the hamster cheek pouch carcinogenesis model. *Journal of Oral Pathology & Medicine*  
521 **34**, 227-231.
- 522 **Rajasekar, M., Suresh, K. and Sivakumar, K.** (2016). Diosmin induce apoptosis through modulation  
523 of STAT-3 signaling in 7,12 dimethylbenz(a)anthracene induced hamster buccal pouch carcinogenesis.  
524 *Biomedicine & Pharmacotherapy* **83**, 1064-1070.
- 525 **Ramu, A., Kathiresan, S. and Bakrudeen, A.** (2017). Gramine inhibits angiogenesis and induces  
526 apoptosis via modulation of TGF- $\beta$  signaling in 7,12 dimethylbenz[a]anthracene (DMBA) induced  
527 hamster buccal pouch carcinoma. *Phytomedicine International Journal of Phytotherapy &*  
528 *Phytopharmacology* **33**, 69.
- 529 **Salley, J. J.** (1954). Experimental carcinogenesis in the cheek pouch of the Syrian hamster. *Journal*  
530 *of Dental Research* **33**, 253.
- 531 **Sanjukta, C., Shaleen, M., Jyoti, D. and Dhananjaya, S.** (2015). Whole genome expression profiling  
532 in chewing-tobacco-associated oral cancers: a pilot study. *Medical Oncology* **32**, 60.
- 533 **See, A. L., Chong, P. K., Lu, S. Y. and Lim, Y. P.** (2014). CXCL3 is a potential target for breast cancer  
534 metastasis. *Current Cancer Drug Targets* **14**, -.
- 535 **Shah, A. D., Bouchard, M. J. and Shieh, A. C.** (2015). Interstitial Fluid Flow Increases Hepatocellular  
536 Carcinoma Cell Invasion through CXCR4/CXCL12 and MEK/ERK Signaling. *Plos One* **10**, e0142337.
- 537 **Shlok, G., Weidong, K., Yingwei, P., Qun, M. and Mackillop, W. J.** (2010). Temporal trends in the  
538 incidence and survival of cancers of the upper aerodigestive tract in Ontario and the United States.  
539 *International Journal of Cancer* **125**, 2159-2165.
- 540 **Siegel, R., Ma, J., Zou, Z. and Jemal, A.** (2014). Cancer statistics, 2014. *Ca Cancer J Clin* **64**, 9.
- 541 **Toung, J. M., Morley, M., Li, M. and Cheung, V. G.** (2011). RNA-sequence analysis of human B-cells.  
542 *Genome Research* **21**, 991.
- 543 **Vera, L., Yunyun, S., Brian, N., Xiaoning, L., Yuri, G., Melissa, L., Anna, L. and Elieser, G.** (2010).  
544 Chemotherapeutic drugs and human tumor cells cytokine network. *International Journal of Cancer* **123**,  
545 2031-2040.
- 546 **Weitzenfeld, P., Kossover, O., Körner, C., Meshel, T., Wiemann, S., Seliktar, D., Legler, D. F. and**  
547 **Ben-Baruch, A.** (2016). Chemokine axes in breast cancer: factors of the tumor microenvironment  
548 reshape the CCR7-driven metastatic spread of luminal-A breast tumors. *Journal of Leukocyte Biology* **99**,  
549 1009–1025.
- 550 **Yu, T., Wu, Y., Helman, J. I., Wen, Y., Wang, C. and Li, L.** (2011). CXCR4 promotes oral squamous  
551 cell carcinoma migration and invasion through inducing expression of MMP-9 and MMP-13 via the ERK  
552 signaling pathway. *Molecular Cancer Research Mcr* **9**, 161.
- 553 **Zeng JH, Lu W, Liang L, Chen G, Lan HH, Liang XY and X, Z.** (2019). Prognosis of clear cell renal cell  
554 carcinoma (ccRCC) based on a six-lncRNA-based risk score: an investigation based on RNA-sequencing  
555 data. *J Transl Med* **17**, 281.

556           **Zhu, J., Jiang, Z., Gao, F., Hu, X., Zhou, L., Chen, J., Luo, H., Sun, J., Wu, S. and Han, Y.** (2011). A  
557 systematic analysis on DNA methylation and the expression of both mRNA and microRNA in bladder  
558 cancer. *Plos One* **6**, e28223.

559           **Zlotnik, A. and Yoshie, O.** (2000). Chemokines : A New Classification System and Their Role in  
560 Immunity. *Immunity* **12**, 121-127.

561

562

563

564

## 565 **Figure legend**

566 **Figure 1. Pathological analysis of oral buccal mucosa between control, solvent control and**  
567 **cancer group.** A: control group ( $\times 200$ ). B: solvent control group ( $\times 200$ ). C & D: cancer group  
568 ( $\times 200$ ). A & B showed that there is a thin layer of connective tissue between the epithelium and  
569 the muscular layer, and the basal cells are arranged in a neatly arranged shape. Meanwhile, in C &  
570 D epithelial cells and nucleus show significant pleomorphism, cells break through the basement  
571 membrane, infiltrate the lamina propria and connective tissue.

572

573

574 **Figure 2. Ultrastructure analysis of oral buccal pouch mucosa between control, solvent control**  
575 **and cancer group.** A: control group ( $\times 8000$ ). B: solvent control group ( $\times 8000$ ). C & D: cancer  
576 group ( $\times 12000$ ). A & B showed that the shape of the cells is regular and closely arranged, the shape  
577 of the nucleus is regular, and the morphology of each organelle is normal and the desmosome is  
578 abundant. At the same time, the C & D showed that the shape of the cells is irregular, the nuclear  
579 condensation into jagged, the nuclear membrane is invaginated, and the desmosome is reduced or  
580 even disappears.

581

582 **Figure 3. The levels of the AFP, SCC-Ag, and TNF- $\alpha$  in oral buccal pouch mucosa between**  
583 **control and cancer group.** TNF- $\alpha$  in Chinese hamsters with OSCC was significantly lower than  
584 healthy control group ( $P < 0.01$ ). While, the level of serum SCC-Ag was higher than healthy  
585 control group ( $P < 0.05$ ). Among them, AFP values were not significantly different between  
586 control and OSCC.

587

588 **Figure 4. Sequence quality and unique alignment sequence distribution of cancer and**  
589 **normal groups.** A: Sequencing quality distribution of the samples. B: The distribution of the  
590 unique alignment sequence in each region of genes in the reference genome.

591

592 **Figure 5. Histograms and volcano plot differentially expressed gene in cancer and normal**  
593 **groups.** A: Histogram, Y-axis is the amount of differentially expressed genes, X-axis is the  
594 classification of differentially expressed genes, red indicates up-regulated genes, green indicates  
595 down-regulated genes, and blue indicates total differentially expressed genes. B: volcano plot, Y-  
596 axis is  $-\log_{10}$  (P-value) of differentially expressed genes, X axis is the  $\log_2$  FoldChange of the  
597 differentially expressed genes, red indicates up-regulated genes and green indicates down-  
598 regulated genes. There were 66 (34.02%) were down-regulated and 128 (65.97%) were up-  
599 regulated.

600

601 **Figure 6. Hierarchical clustering of differentially expressed genes in oral squamous cell**  
602 **carcinoma and normal tissues.** A: Hierarchical clustering graph, each rectangle represents the  
603 expression value of a certain gene (row) in a certain sample (column), and the gene expression  
604 changes from blue (low expression) to red (high expression). B: The top five up-regulated and down-  
605 regulated genes.

606

607 **Figure 7. GO classification statistics histogram of differentially expressed genes between**  
608 **cancer and normal groups.** Red indicates up-regulated genes, green indicates down-regulated  
609 genes, and all differentially-expressed genes are classified into 67 different subclasses (third-level  
610 entry) according to GO classification.

611

612 **Figure 8.** A: chemokine signaling pathway. B: tumor necrosis factor signaling pathway.  
613 All signaling pathways are cited from [www.kegg.jp/kegg/kegg1.html](http://www.kegg.jp/kegg/kegg1.html).

614

615 **Figure 9. qRT-PCR validation transcriptome sequencing results.** The first line is the relative  
616 expression level of differentially expressed genes in oral buccal mucosa tissues of Chinese hamster  
617 detected by qRT-PCR (n=3). The second line is the expression level of differentially expressed genes  
618 in each tissue detected by transcriptome sequencing (RPKM, n=3).

619

620

621 **Table:**

622 **Table1.** Primers sequence information.

| Gene           | Sequence                         | Length |
|----------------|----------------------------------|--------|
| CXCL1          | 5'-GTGTCAACCACTGTAAGAGAAGCA-3'   | 24     |
|                | 5'-ACACATTCCCTCACCCCTAATACAAA-3' | 25     |
| CXCL2          | 5'-CCAGACAGAAGTCATTGCCACTC-3'    | 23     |
|                | 5'-GCCTTGCCTTTGTTTCAGTATCTTT-3'  | 24     |
| CXCL3          | 5'-TGAGGCAGGAAAGGAGGAAG-3'       | 20     |
|                | 5'-TGTTCAAAGCAAACAGGAGAGG-3'     | 22     |
| CCL7           | 5'-CCCTGGGAAGCTGTGATCT-3'        | 19     |
|                | 5'-GGCTTTGGAGTTTGGGTTTTTC-3'     | 21     |
| MMP9           | 5'-CCTTGTCACCTTCCCTTCACCTT-3'    | 23     |
|                | 5'-ATTTGCGGTCGGTGTCGT-3'         | 18     |
| $\beta$ -Actin | 5'-GTGCTGTCCCTGTATGCCTCT-3'      | 21     |
|                | 5'-GTCACGCACAATTTCCCTCTC-3'      | 21     |

623

624

625

626

627

628

629

**Table2.** Top thirty genes altered in cancer group.

| Gene         | Log <sub>2</sub> Ratio | Corrected <i>P</i> -value* | Gene         | Log <sub>2</sub> Ratio | Corrected <i>P</i> -value* |
|--------------|------------------------|----------------------------|--------------|------------------------|----------------------------|
| CXCL2        | 26.69                  | 5.54E-15                   | CCL7         | 5.88                   | 2.13E-05                   |
| MMP13        | 11.69                  | 1.18E-14                   | IL1B         | 11.53                  | 2.13E-05                   |
| CCL3         | 26.24                  | 4.13E-14                   | PTX3         | 7.31                   | 2.38E-05                   |
| LCN1         | 25.19                  | 1.27E-10                   | CAIV         | 5.85                   | 2.38E-05                   |
| MMP9         | 7.42                   | 4.35E-09                   | CXCL7        | 22.94                  | 4.54E-05                   |
| CXCL3        | 6.52                   | 1.42E-07                   | OLR1         | 22.97                  | 4.61E-05                   |
| STRA6        | 7.15                   | 1.68E-07                   | RN45s        | -8.19                  | 5.53E-05                   |
| LOC100754872 | 23.63                  | 6.98E-07                   | THBS1        | 4.72                   | 6.72E-05                   |
| Serpine1     | 6.05                   | 8.31E-07                   | IL-36 γ      | 6.67                   | 9.12E-05                   |
| TNN          | 8.20                   | 1.23E-06                   | CXCL1        | 5.77                   | 0.0001                     |
| CTHRC1       | 8.46                   | 1.35E-06                   | LOC100766767 | -7.59                  | 0.0001                     |
| GPx6         | -24.40                 | 4.67E-06                   | MS4A7        | 5.99                   | 0.0001                     |
| CTRP6        | 5.52                   | 6.88E-06                   | SFRP2        | 5.02                   | 0.0001                     |
| LOC100764819 | -8.33                  | 1.40E-05                   | POSTN        | 4.81                   | 0.000115                   |
| SLN          | -6.62                  | 1.49E-05                   | MMP12        | 5.23                   | 0.000121                   |

630

631

632

633

634 **Table3.** GO enrichment analysis of differentially expressed genes in cancer and normal groups.

635 (FDR<0.05) (BP: Biological Process; CC: Cellular Component; MF: Molecular Function)

| GO name                                     | GO category | GO classification number | Number of genes | P-value  | FDR      |
|---------------------------------------------|-------------|--------------------------|-----------------|----------|----------|
| granulocyte chemotaxis                      | BP          | GO:0071621               | 11              | 4.40E-12 | 5.60E-08 |
| granulocyte migration                       | BP          | GO:0097530               | 11              | 1.00E-11 | 6.36E-08 |
| cell chemotaxis                             | BP          | GO:0060326               | 15              | 2.20E-11 | 8.27E-08 |
| leukocyte chemotaxis                        | BP          | GO:0030595               | 13              | 2.60E-11 | 8.27E-08 |
| myeloid leukocyte migration                 | BP          | GO:0097529               | 12              | 6.10E-11 | 1.55E-07 |
| cell migration                              | BP          | GO:0016477               | 31              | 1.10E-10 | 2.33E-07 |
| cell motility                               | BP          | GO:0048870               | 32              | 1.70E-10 | 2.70E-07 |
| localization of cell                        | BP          | GO:0051674               | 32              | 1.70E-10 | 2.70E-07 |
| leukocyte migration                         | BP          | GO:0050900               | 15              | 2.30E-10 | 3.25E-07 |
| neutrophil chemotaxis                       | BP          | GO:0030593               | 9               | 4.80E-10 | 6.11E-07 |
| extracellular matrix                        | CC          | GO:0031012               | 29              | 2.10E-19 | 3.04E-16 |
| extracellular space                         | CC          | GO:0005615               | 42              | 1.30E-18 | 9.40E-16 |
| extracellular region                        | CC          | GO:0005576               | 85              | 3.00E-18 | 1.45E-15 |
| proteinaceous extracellular matrix          | CC          | GO:0005578               | 25              | 3.60E-17 | 1.30E-14 |
| extracellular region part                   | CC          | GO:0044421               | 73              | 8.20E-17 | 2.37E-14 |
| extracellular matrix component              | CC          | GO:0044420               | 11              | 8.10E-09 | 1.95E-06 |
| sarcoplasmic reticulum                      | CC          | GO:0016529               | 8               | 1.70E-08 | 3.51E-06 |
| sarcoplasm                                  | CC          | GO:0016528               | 8               | 4.20E-08 | 7.59E-06 |
| collagen trimer                             | CC          | GO:0005581               | 9               | 7.80E-08 | 1.25E-05 |
| striated muscle thin filament               | CC          | GO:0005865               | 4               | 1.50E-06 | 2.17E-04 |
| cytokine activity                           | MF          | GO:0005125               | 7               | 6.70E-06 | 0.026    |
| extracellular matrix structural constituent | MF          | GO:0005201               | 5               | 2.60E-05 | 0.049    |

636

637



638

639 **Table4.** Significant enrichment pathway of differentially expressed genes (Q-value<0.05)

| KEGG signal pathway                    | Map      | Count | Q-value | Genes                                               |
|----------------------------------------|----------|-------|---------|-----------------------------------------------------|
| Malaria                                | map05144 | 5     | 0.002   | CSF3;IL1B;THBS2;SELP;CCL2                           |
| ECM-receptor interaction               | map04512 | 6     | 0.005   | LOC103164586;TNC;<br>THBS2;TNN;SPP1;COL1A1          |
| Salmonella infection                   | map05132 | 6     | 0.005   | CXCL1;CXCL3;CXCL2;IL1B;<br>CCL4; CCL3               |
| Chemokine signaling pathway            | map04062 | 8     | 0.005   | CCL7;CXCL1;CXCL3;CXCL2;<br>CCL4;CCL3;CCL2;CXCL7;    |
| Protein digestion and absorption       | map04974 | 6     | 0.005   | LOC10316458; OL18A;COL7A;<br>COL12A;COL1A1; SLC1A1; |
| Cytokine-cytokine receptor interaction | map04060 | 8     | 0.006   | CSF3R;CCL7;CSF3;IL1B;<br>CCL4;CCL3;CCL2;CXCL7       |
| TNF signaling pathway                  | map04668 | 6     | 0.008   | CXCL1;CXCL3;CXCL2;<br>MMP9;IL1B;CCL2;               |
| Toll-like receptor signaling pathway   | map04620 | 5     | 0.047   | IL1B;CCL4;CCL3;SPP1;CTSK;                           |

640

641

642

643

**Table5.** GO and KEGG enrichment pathways of 5 screened genes

| Gene  | <i>P</i> -value | GO-BP | TOP 3 GO-BP enrichment pathway | KEGG enrichment pathway                |
|-------|-----------------|-------|--------------------------------|----------------------------------------|
| CXCL1 | 0.0001          | 13    | cell chemotaxis                | Salmonella infection                   |
|       |                 |       | cell migration                 | Chemokine signaling pathway            |
|       |                 |       | cell motility                  | TNF signaling pathway                  |
| CXCL2 | 5.54E-15        | 41    | granulocyte chemotaxis         | Salmonella infection                   |
|       |                 |       | granulocyte migration          | Chemokine signaling pathway            |
|       |                 |       | cell chemotaxis                | TNF signaling pathway                  |
| CXCL3 | 1.42E-07        | 33    | granulocyte chemotaxis         | Salmonella infection                   |
|       |                 |       | granulocyte migration          | Chemokine signaling pathway            |
|       |                 |       | cell chemotaxis                | TNF signaling pathway                  |
| CCL7  | 2.13E-05        | 101   | granulocyte chemotaxis         | Chemokine signaling pathway            |
|       |                 |       | granulocyte migration          | Cytokine-cytokine receptor interaction |
|       |                 |       | cell chemotaxis                |                                        |
| MMP9  | 4.35E-09        | 60    | cell migration                 |                                        |
|       |                 |       | cell motility                  | TNF signaling pathway                  |
|       |                 |       | localization of cell           |                                        |

644

645

646

647 **Figure:**

648 **Figure 1**

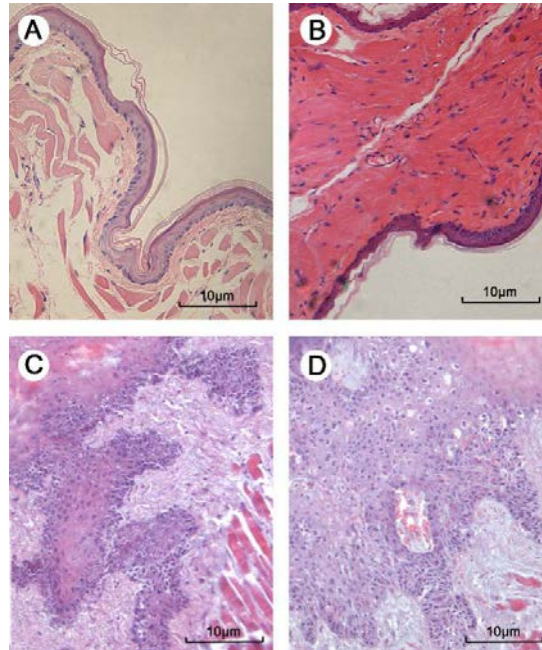

649

650 **Figure 1. Pathological analysis of oral buccal mucosa between control, solvent control and**  
651 **cancer group.** A: control group ( $\times 200$ ). B: solvent control group ( $\times 200$ ). C & D: cancer group  
652 ( $\times 200$ ). A & B showed that there is a thin layer of connective tissue between the epithelium and  
653 the muscular layer, and the basal cells are arranged in a neatly arranged shape. Meanwhile, in C &  
654 D epithelial cells and nucleus show significant pleomorphism, cells break through the basement  
655 membrane, infiltrate the lamina propria and connective tissue.

656

657 **Figure 2**

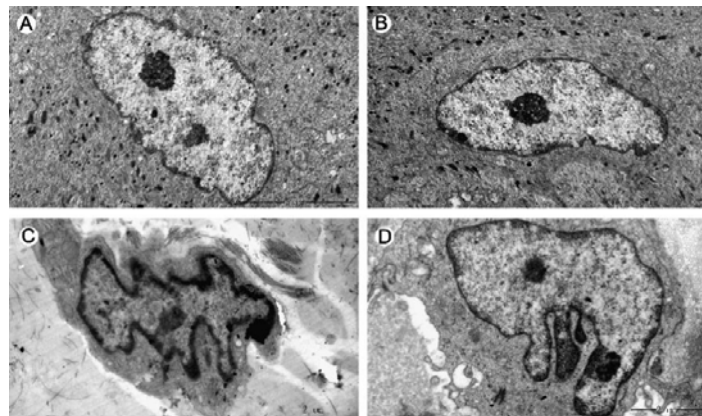

658

659 **Figure 2. Ultrastructure analysis of oral buccal pouch mucosa between control, solvent control**  
660 **and cancer group.** A: control group ( $\times 8000$ ). B: solvent control group ( $\times 8000$ ). C & D: cancer  
661 group ( $\times 12000$ ). A & B showed that the shape of the cells is regular and closely arranged, the shape  
662 of the nucleus is regular, and the morphology of each organelle is normal and the desmosome is  
663 abundant. At the same time, the C & D showed that the shape of the cells is irregular, the nuclear  
664 condensation into jagged, the nuclear membrane is invaginated, and the desmosome is reduced or  
665 even disappears.

666

667 **Figure 3**

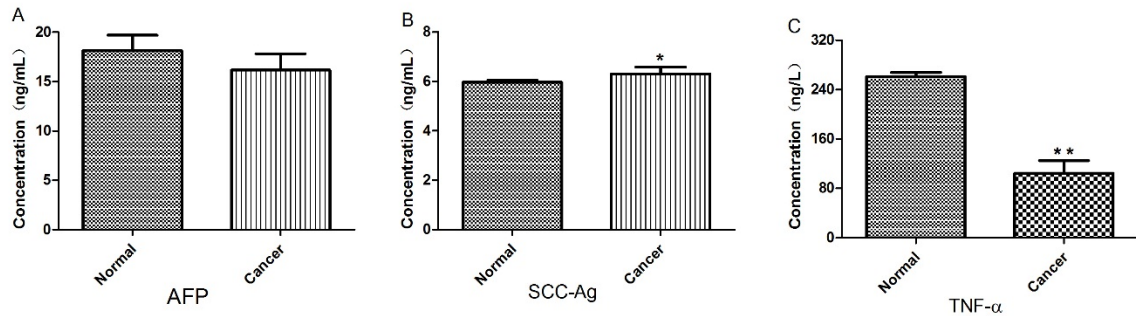

668

669 **Figure 3. The levels of the AFP, SCC-Ag, and TNF- $\alpha$  in oral buccal pouch mucosa between**

670 **control and cancer group. TNF- $\alpha$  in Chinese hamsters with OSCC was significantly lower than**

671 **healthy control group ( $P < 0.01$ ). While, the level of serum SCC-Ag was higher than healthy**

672 **control group ( $P < 0.05$ ). Among them, AFP values were not significantly different between**

673 **control and OSCC.**

674

675 **Figure 4**

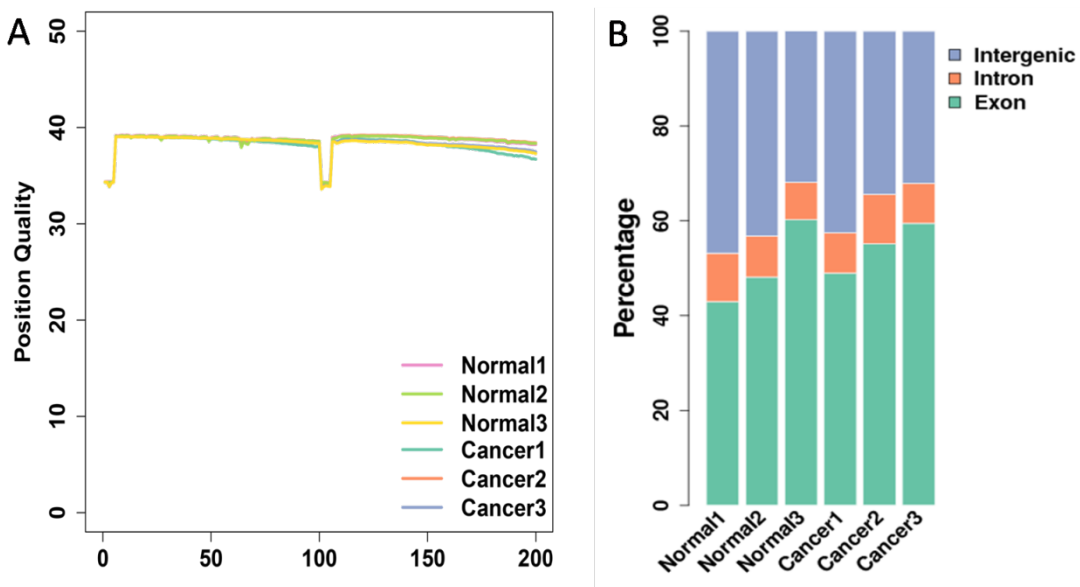

676

677 **Figure 4. Sequence quality and unique alignment sequence distribution of cancer and**

678 **normal groups. (A: Sequencing quality distribution of the samples. B: The distribution of the**

679 **unique alignment sequence in each region of genes in the reference genome.)**

680

681

682

683 **Figure 5**

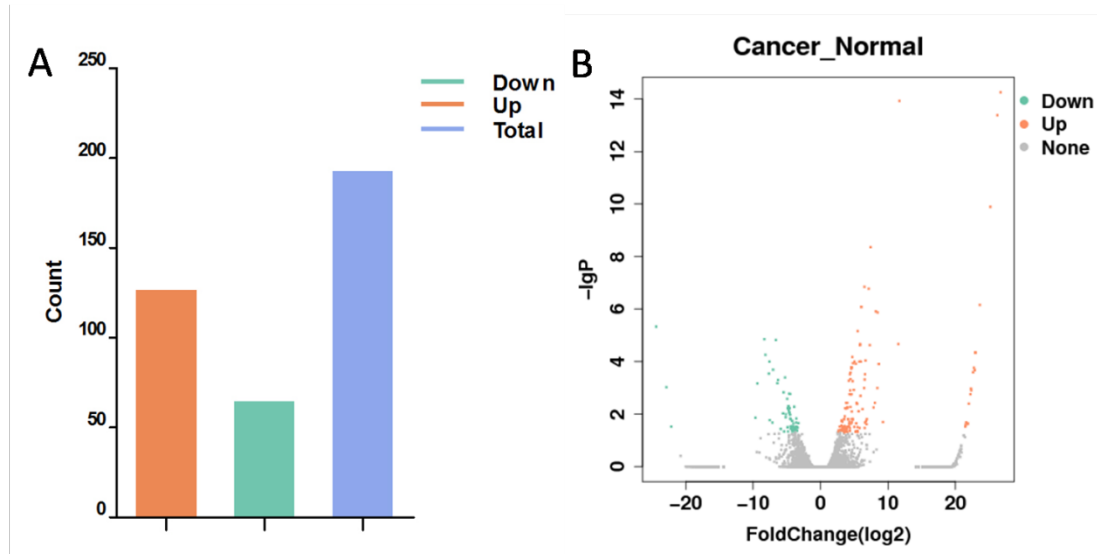

684

685 **Figure 5. Histograms and volcano plot differentially expressed gene in cancer and normal**

686 **groups.** (A: Histogram, Y-axis is the amount of differentially expressed genes, X-axis is the

687 classification of differentially expressed genes, red indicates up-regulated genes, green indicates

688 down-regulated genes, and blue indicates total differentially expressed genes. B: volcano plot, Y-

689 axis is  $-\log_{10}$  (P-value) of differentially expressed genes, X axis is the  $\log_2$  FoldChange of the

690 differentially expressed genes, red indicates up-regulated genes and green indicates down-

691 regulated genes. There were 66 (34.02%) were down-regulated and 128 (65.97%) were up-

692 regulated)

693

694 **Figure 6**

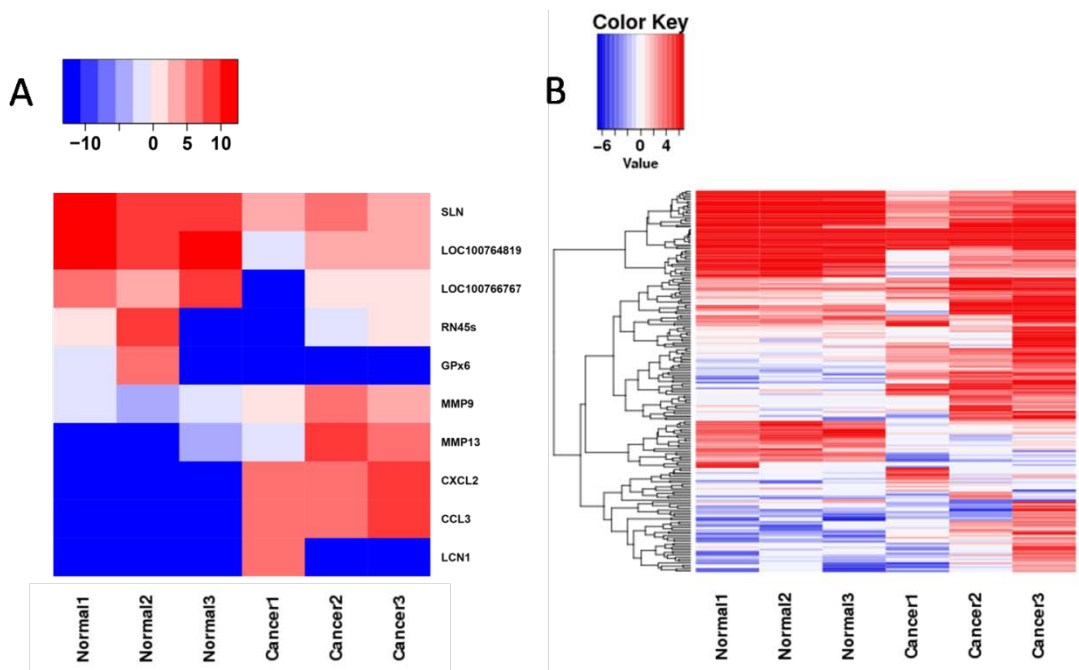

695

696 **Figure 6. Hierarchical clustering of differentially expressed genes in oral squamous cell**  
 697 **carcinoma and normal tissues (A: Hierarchical clustering graph, each rectangle represents the**  
 698 **expression value of a certain gene (row) in a certain sample (column), and the gene expression**  
 699 **changes from blue (low expression) to red (high expression). B: The top five up-regulated and**  
 700 **down-regulated genes)**

701

702 **Figure 7**

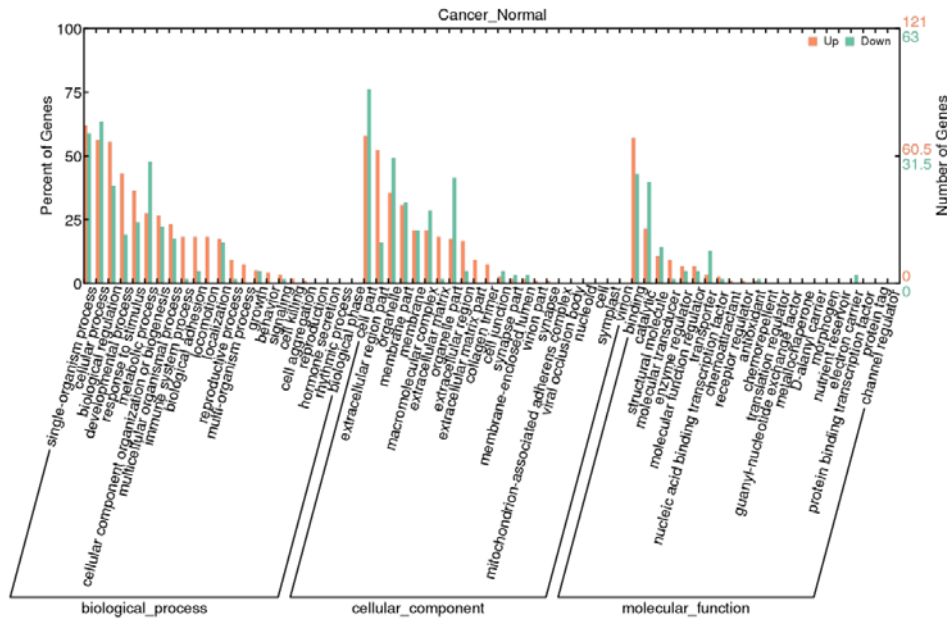

703

704 **Figure 7. GO classification statistics histogram of differentially expressed genes between**  
 705 **cancer and normal groups. (Red indicates up-regulated genes, green indicates down-regulated**  
 706 **genes, and all differentially-expressed genes are classified into 67 different subclasses (third-level**  
 707 **entry) according to GO classification.)**

708

709 **Figure 8**

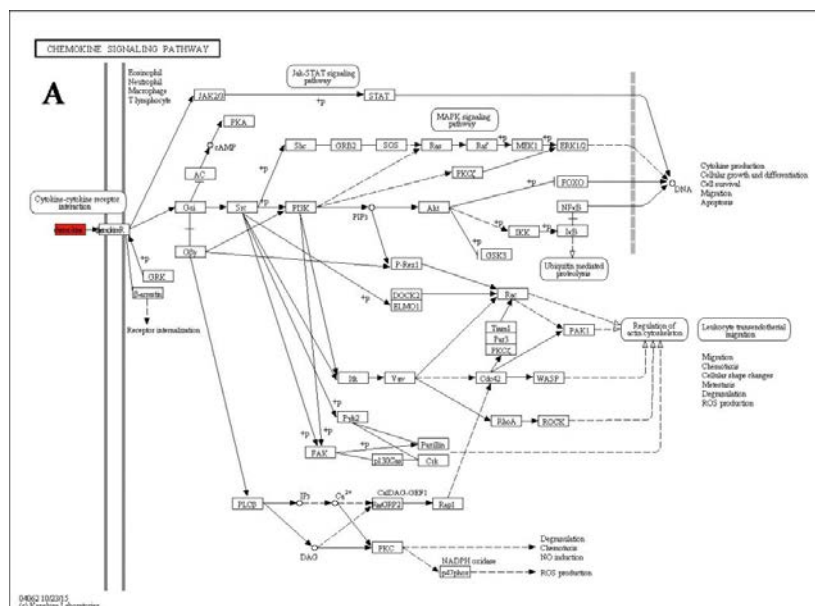

710

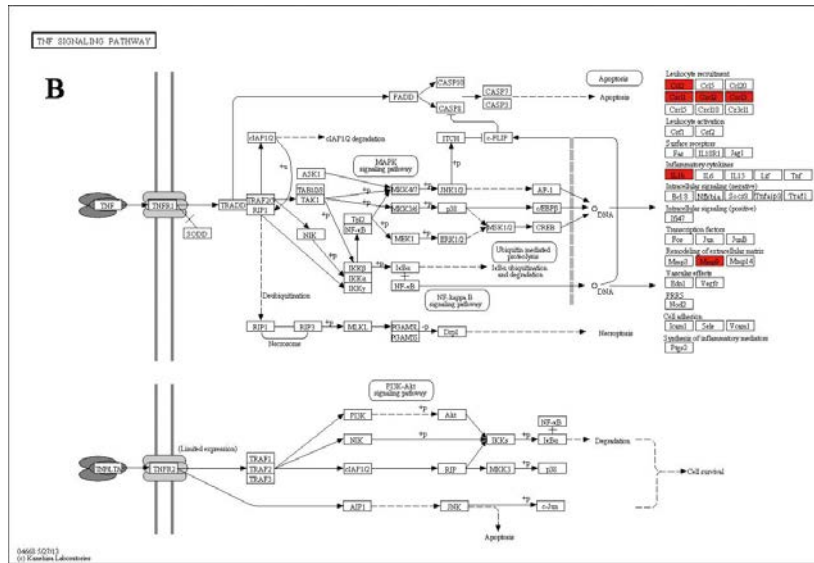

711

712 **Figure 8. A:** chemokine signaling pathway. **B:** tumor necrosis factor signaling pathway.

713 All signaling pathways are cited from [www.kegg.jp/kegg/kegg1.html](http://www.kegg.jp/kegg/kegg1.html).

714

715 **Figure 9**

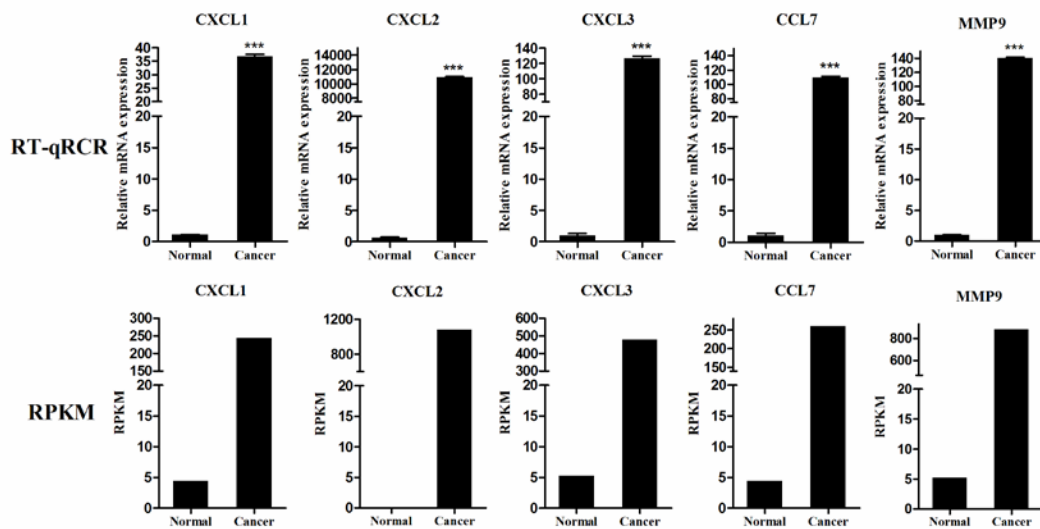

716

717 **Figure 9. qRT-PCR validation transcriptome sequencing results.** The first line is the relative

718 expression level of differentially expressed genes in oral buccal mucosa tissues of Chinese hamster

719 detected by qRT-PCR (n=3). The second line is the expression level of differentially expressed genes

720 in each tissue detected by transcriptome sequencing (RPKM, n=3).

721

722

723
